# Supplementary material
Source: PubMed Central journal article supplement (PMC7376871)
Supplement: jexbio-222-207761-s1.pdf [file jexbio-222-207761-s1.pdf]

**Figure S1:** Heatmaps for overall data, including caged bees, Time 0 bees and bees in-hive for all target genes. Both heatmaps are generated in order to visualize the highest similarity per target genes and samples, respectively.

Fig. S1

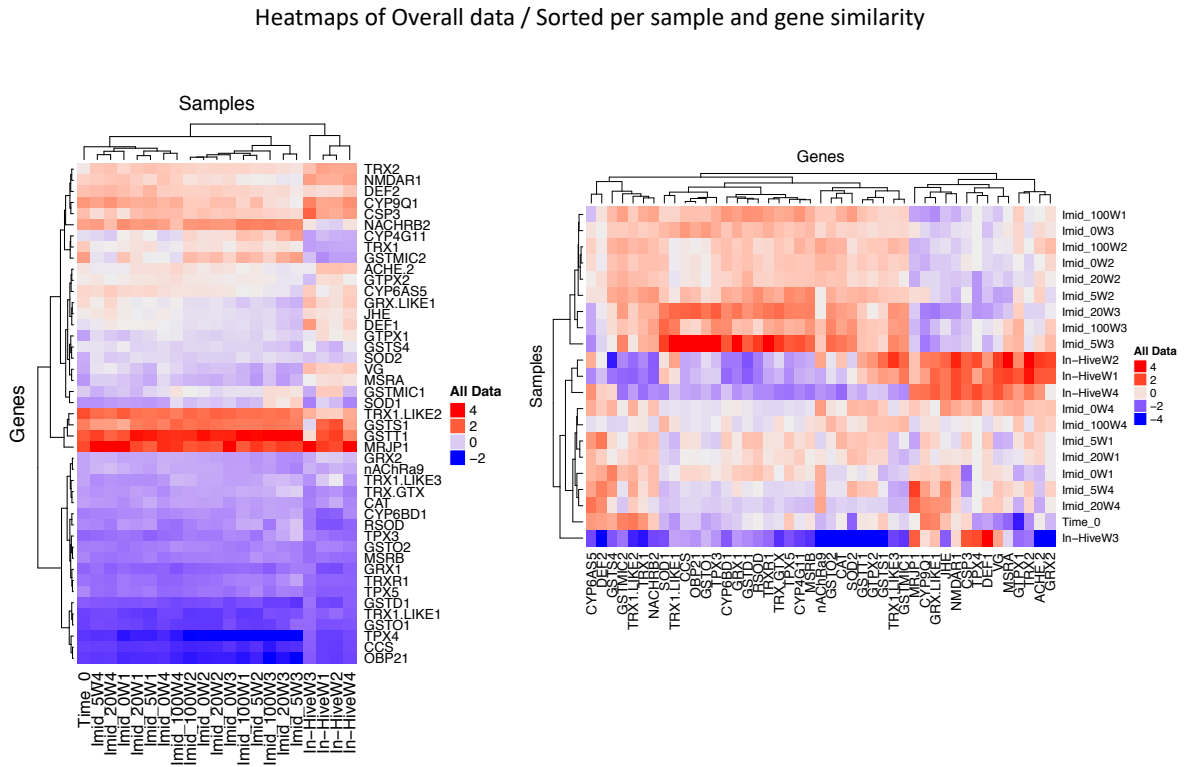

**Figure S2** Weekly analysis of gene expression for caged bees exposed to imidacloprid compared with the control (0 PPB). MDS plots are given per week as well as hierarchical clustering plots. Right set of plots shows no DEGs at any time point.

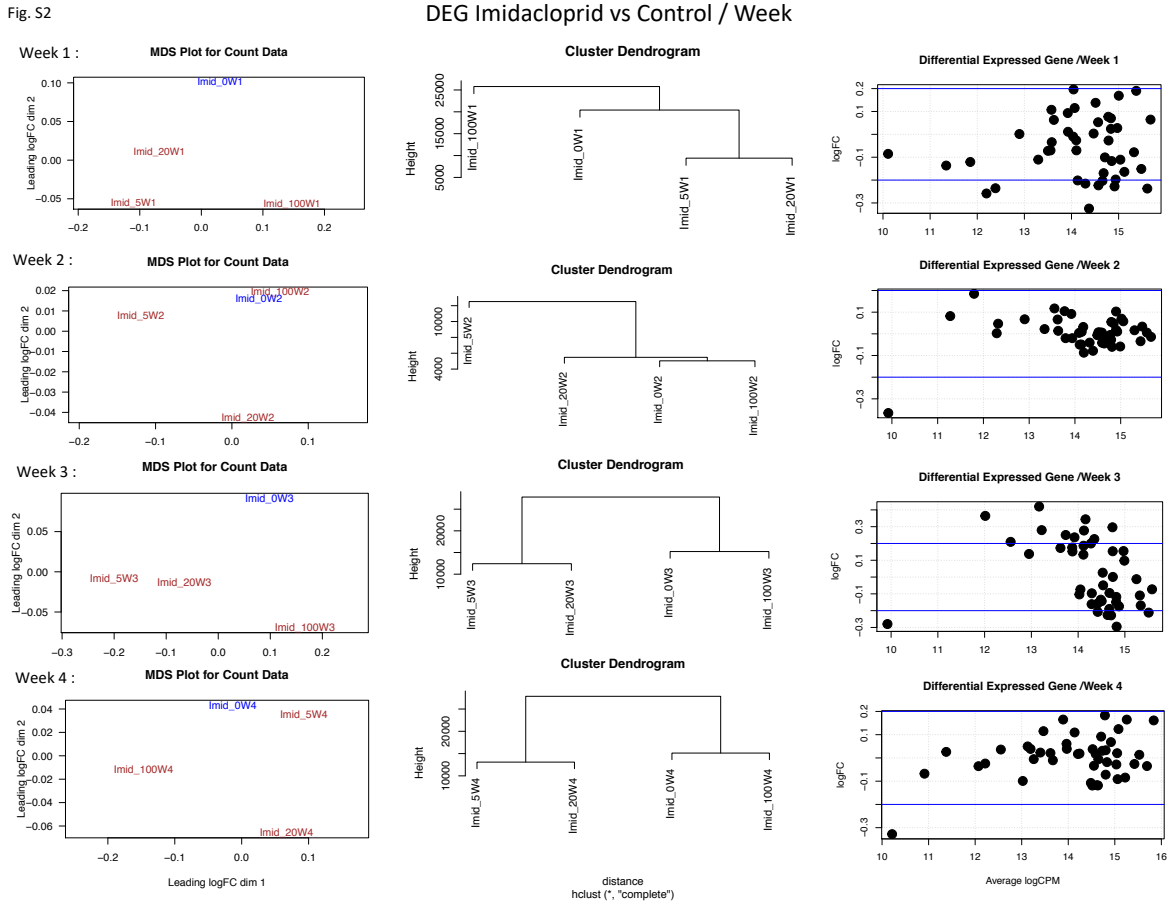

**Figure S3** Shows a multi-dimensional scaling MDS of the DEG between Cage and Hive bees based on log-fold-changes between each pair of RNA samples as well as an hierarchical clustering plot of the same dataset.

Fig. S3

DEG Cage vs Hive / Overall

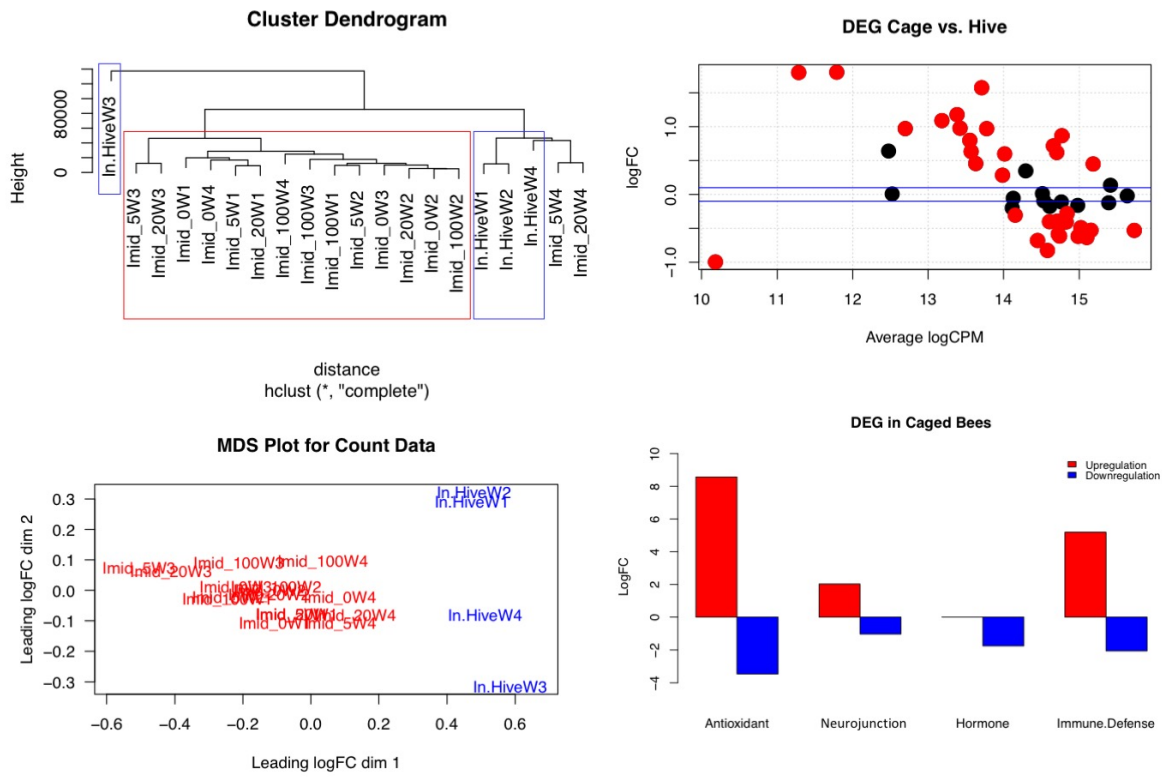

**Figure S4:** General view of the cages used in this experiment. Protein patties were provided to caged bees inside the red robber plugs, water and syrup treatment through both upper syringes. View of bees feeding on syrup and patty inside the cages.

Fig. S4

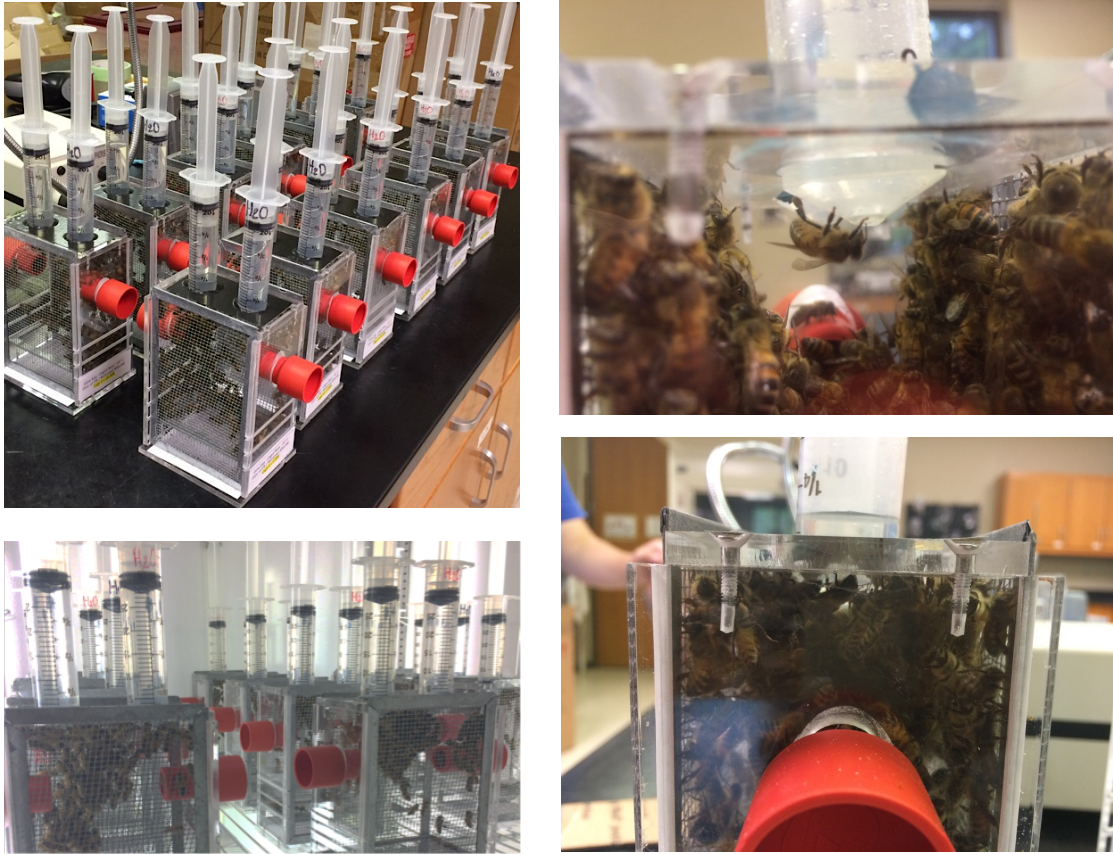

**Table S1. Descriptive list of the studied genes targeted by RNA-seq**

| <i>N</i>            | Gene code  | Description/known gene function                            | Gene ID:<br>NCBI/Beebase | References                                        |
|---------------------|------------|------------------------------------------------------------|--------------------------|---------------------------------------------------|
| <b>Target genes</b> |            |                                                            |                          |                                                   |
| <b>Antioxidant</b>  |            |                                                            |                          |                                                   |
| 1                   | Cat        | Catalase                                                   | 443552                   | Alburaki et al., 2017a                            |
| 2                   | GstO1      | Pyrimidodiazepine synthase                                 | 552118                   | Corona and Robinson, 2006                         |
| 3                   | GstO2      | Glutathione S-transferase omega-1                          | 726823                   | Corona and Robinson, 2006                         |
| 4                   | GstS1      | Glutathione S-transferase S1                               | 552304                   | Corona and Robinson, 2006; Liu et al., 2016       |
| 5                   | GstS4      | Glutathione S-transferase S4                               | 411045                   | Alburaki et al., 2017a; Corona and Robinson, 2006 |
| 6                   | GSTmic1    | Microsomal glutathione S-transferase 1                     | 410837                   | Corona and Robinson, 2006                         |
| 7                   | GSTmic2    | Uncharacterized LOC725853/Protein coding                   | 725853                   | Corona and Robinson, 2006                         |
| 8                   | GstT1      | Glutathione S-transferase theta-1                          | 552314                   | Corona and Robinson, 2006                         |
| 9                   | Gtpx1      | Glutathione peroxidase-like 1                              | 494523                   | Corona and Robinson, 2006                         |
| 10                  | Gtpx2      | Probable phospholipid hydroperoxide glutathione peroxidase | 726269                   | Corona and Robinson, 2006                         |
| 11                  | GstD1      | Glutathione S-transferase D1                               | 409490                   | Alburaki et al., 2017a; Corona and Robinson, 2006 |
| 12                  | Sod1       | Superoxide dismutase 1                                     | 409398                   | Corona and Robinson, 2006                         |
| 13                  | Sod2       | Superoxide dismutase 2                                     | 410082                   | Corona and Robinson, 2006                         |
| 14                  | MsrA       | Methionine sulphoxide reductase A                          | 409097                   | Corona and Robinson, 2006                         |
| 15                  | MsrB       | Methionine sulphoxide reductase B                          | 724494                   | Corona and Robinson, 2006                         |
| 16                  | Trx-1      | Thioredoxin, mitochondrial                                 | 410120                   | Corona and Robinson, 2006                         |
| 17                  | Trx-2      | Thioredoxin-2                                              | 409451                   | Corona and Robinson, 2006                         |
| 18                  | Trx/Gtx    | Glutaredoxin 3                                             | 409355                   | Corona and Robinson, 2006                         |
| 19                  | Trx1-like1 | Thioredoxin-like protein 1                                 | 550734                   | Corona and Robinson, 2006                         |
| 20                  | Trx1-like2 | Uncharacterized LOC725664/Protein coding                   | 725664                   | Corona and Robinson, 2006                         |
| 21                  | Trx1-like3 | Endoplasmic reticulum resident protein                     | 552191                   | Corona and Robinson, 2006                         |

| <i>N</i>               | Gene code | Description/known gene function               | Gene ID:<br>NCBI/Ensembl | References                                                    |
|------------------------|-----------|-----------------------------------------------|--------------------------|---------------------------------------------------------------|
| 22                     | Trxr-1    | Thioredoxin reductase 1                       | 410032                   | Corona and Robinson, 2006                                     |
| 23                     | Tpx3      | Thioredoxin peroxidase 3                      | 408540                   | Corona and Robinson, 2006                                     |
| 24                     | Tpx4      | Thioredoxin peroxidase 4                      | 551975                   | Corona and Robinson, 2006                                     |
| 25                     | Tpx5-6    | Peroxiredoxin-6                               | 411852                   | Corona and Robinson, 2006                                     |
| 26                     | CCS       | Copper chaperone for superoxide dismutase     | 552629                   | Corona and Robinson, 2006                                     |
| 27                     | Grx-like1 | Uncharacterized LOC411159/Protein coding      | 411159                   | Corona and Robinson, 2006                                     |
| 28                     | Grx1      | Glutaredoxin-C4                               | 727309                   | Corona and Robinson, 2006                                     |
| 29                     | Grx2      | Glutaredoxin-related protein 5, mitochondrial | 552835                   | Corona and Robinson, 2006                                     |
| 30                     | Rsod      | Uncharacterized LOC413369/Protein coding      | 413369                   | Corona and Robinson, 2006                                     |
| Immune defense/sensory |           |                                               |                          |                                                               |
| 31                     | Def1      | Defensin-1                                    | 406143                   | Aronstein and Saldivar, 2005; Richard et al., 2012            |
| 32                     | Def2      | Defensin-2                                    | 413397                   | Aronstein and Saldivar, 2005; Richard et al., 2012            |
| 33                     | CSP3/ASP  | Chemosensory protein 3                        | 406094                   | Briand et al., 2002                                           |
| 34                     | Cyp4g11   | Cytochrome P450 4G11                          | 409469                   | Gong and Diao, 2017                                           |
| 35                     | Cyp6as5   | Cytochrome P450 6AS5                          | 409677                   | Alptekin et al., 2016                                         |
| 36                     | Cyp6bd1   | Cytochrome P450 6k1                           | 551560                   | Li et al., 2014                                               |
| 37                     | Cyp9q1    | Cytochrome P450 9e2                           | 410492                   | Mao et al., 2011                                              |
| 38                     | Obp21     | Odorant binding protein 21                    | 551935                   | Iovinella et al., 2011                                        |
| Development/hormone    |           |                                               |                          |                                                               |
| 39                     | Vg        | Vitellogenin                                  | 406088                   | Amdam et al., 2006; Bordier et al., 2017; Nelson et al., 2007 |
| 40                     | Jhe/Est   | Juvenile hormone esterase                     | 406066                   | Bordier et al., 2017                                          |
| 41                     | Mrjp1     | Major royal jelly protein1                    |                          | Buttstedt et al., 2014                                        |
| Neuro-junction         |           |                                               |                          |                                                               |

| <i>N</i>                  | Gene code | Description/known gene function                 | Gene ID:<br>NCBI/Ensembl | References             |
|---------------------------|-----------|-------------------------------------------------|--------------------------|------------------------|
| 42                        | AChE-2    | Acetylcholinesterase 2                          | 406104                   | Alburaki et al., 2017a |
| 43                        | nAChRa9   | Nicotinic acetylcholine receptor alpha9 subunit | 411303                   | Alptekin et al., 2016  |
| 44                        | nAChRb2   | Nicotinic acetylcholine receptor beta2 subunit  | 726079                   | Alptekin et al., 2016  |
| 45                        | Nmdar1    | NMDA receptor 1                                 | 406079                   | Mussig et al., 2010    |
| <b>Housekeeping genes</b> |           |                                                 |                          |                        |
| 1                         | Ancr1     | AncR-1 non-coding nuclear RNA                   | 100049571                | Alburaki et al., 2017a |
| 2                         | Camkii    | Calcium/calmodulin-dependent protein kinase II  | 551691                   | Alburaki et al., 2017a |
| 3                         | GAPDH     | Glyceraldehyde-3-phosphate dehydrogenase 2      | XM_393605.6              | Alburaki et al., 2017a |
| 4                         | E2F       | Transcription factor E2F4                       | XM_006566781.2           | Alburaki et al., 2017a |

Genes included are involved in various processes: antioxidant, immune defense, nervous system regulation and hormone production. Target genes were standardized against four housekeeping genes.

**Table S2. Differentially expressed genes (DEGs) between caged bees and in-hive bees across 4 weeks**

| Gene          | FDR         | logFC        | Regulation |
|---------------|-------------|--------------|------------|
| Week 1        |             |              |            |
| 1 Rsod        | 8.79E-11    | 2.052154955  | Up         |
| 2 GSTmic2     | 1.51E-10    | 1.283773182  | Up         |
| 3 cyp6bd1     | 5.62E-07    | 1.502223105  | Up         |
| 4 nAChRb2     | 1.41E-06    | 0.760356888  | Up         |
| 5 Trx-1       | 1.79E-05    | 0.815020997  | Up         |
| 6 Vg          | 2.85E-05    | -0.68666675  | Down       |
| 7 GSTmic1     | 0.000105929 | -0.625977048 | Down       |
| 8 Grx1        | 0.000147178 | 1.466580514  | Up         |
| 9 MsrA        | 0.000147178 | -0.640895526 | Down       |
| 10 Tpx5       | 0.000326753 | 1.151666352  | Up         |
| 11 GstD1      | 0.000529584 | 1.626628738  | Up         |
| 12 Cyp4g11    | 0.003272353 | 0.538929922  | Up         |
| 13 Trx1-like2 | 0.004426979 | 0.409447152  | Up         |
| 14 Trxr-1     | 0.004426979 | 0.894300369  | Up         |
| 15 Gtpx1      | 0.007143152 | -0.45210316  | Down       |
| 16 Trx1-like3 | 0.007416819 | -0.53308333  | Down       |
| 17 Trx-2      | 0.007416819 | -0.396484705 | Down       |
| 18 Nmdar1     | 0.010552677 | -0.390262699 | Down       |
| 19 AChE-2     | 0.013164542 | -0.384722407 | Down       |
| 20 CCS        | 0.013164542 | 1.789933422  | Up         |
| 21 Sod1       | 0.022290396 | -0.443546    | Down       |
| 22 CSP3       | 0.029977795 | -0.347780712 | Down       |
| 23 Grx-like1  | 0.038464198 | -0.345534644 | Down       |
| 24 Grx2       | 0.044258894 | -0.395457615 | Down       |
| 25 GstS1      | 0.045643338 | -0.303379857 | Down       |



| Gene   | FDR        | logFC       | Regulation           |      |
|--------|------------|-------------|----------------------|------|
|        |            |             | <b>Up=12 Down=13</b> |      |
| Week 2 |            |             |                      |      |
| 1      | GSTmic2    | 5.63E-10    | 1.125683012          | Up   |
| 2      | Rsod       | 1.38E-09    | 1.920755161          | Up   |
| 3      | nAChRb2    | 1.34E-07    | 0.816655652          | Up   |
| 4      | Cyp6bd1    | 2.17E-06    | 1.359483887          | Up   |
| 5      | Grx1       | 6.34E-06    | 1.676160098          | Up   |
| 6      | MsrA       | 6.34E-06    | -0.750403485         | Down |
| 7      | Trx1       | 1.50E-05    | 0.793851856          | Up   |
| 8      | Vg         | 1.50E-05    | -0.691147669         | Down |
| 9      | Cyp4g11    | 3.29E-05    | 0.736912478          | Up   |
| 10     | GstD1      | 4.01E-05    | 1.850627106          | Up   |
| 11     | Tpx5       | 0.000248075 | 1.141077705          | Up   |
| 12     | Nmdar1     | 0.001369615 | -0.462428888         | Down |
| 13     | Trx1-like2 | 0.001746155 | 0.435546394          | Up   |
| 14     | Trx1-like3 | 0.002126055 | -0.540989241         | Down |
| 15     | Trx2       | 0.003455925 | -0.412143627         | Down |
| 16     | GSTmic1    | 0.004504549 | -0.442902891         | Down |
| 17     | MsrB       | 0.005116035 | 0.773936843          | Up   |
| 18     | Trxr-1     | 0.008514979 | 0.807396999          | Up   |
| 19     | CCS        | 0.012821076 | 1.79540416           | Up   |
| 20     | GstS1      | 0.012821076 | -0.29896178          | Down |
| 21     | Tpx3       | 0.021384737 | 0.670350958          | Up   |
| 22     | AChE-2     | 0.022404618 | -0.339632338         | Down |
| 23     | Cyp9q1     | 0.022960491 | -0.314596096         | Down |
| 24     | CSP3       | 0.036059913 | -0.295797369         | Down |
|        |            |             | <b>Up=14 Down=10</b> |      |

| Gene          | FDR         | logFC        | Regulation |
|---------------|-------------|--------------|------------|
| Week 3        |             |              |            |
| 1 Mrjp1       | 8.48E-30    | -1.334501094 | Down       |
| 2 CSP3        | 8.01E-23    | -1.378281782 | Down       |
| 3 Def1        | 4.70E-21    | -1.48284558  | Down       |
| 4 Cyp9q1      | 7.19E-17    | -1.26844048  | Down       |
| 5 Vg          | 1.03E-16    | -1.415441134 | Down       |
| 6 Nmdar1      | 3.76E-15    | -1.219803445 | Down       |
| 7 Grx-like1   | 5.39E-15    | -1.306168202 | Down       |
| 8 Cyp6as5     | 9.79E-08    | -0.932079671 | Down       |
| 9 Sod1        | 3.25E-07    | 1.453492666  | Up         |
| 10 Trx2       | 3.33E-07    | -0.843916112 | Down       |
| 11 Jhe        | 3.50E-07    | -0.926640082 | Down       |
| 12 MsrA       | 3.26E-06    | -0.912448636 | Down       |
| 13 GstS4      | 6.02E-05    | -0.787091217 | Down       |
| 14 MsrB       | 0.000167022 | 1.515519968  | Up         |
| 15 Trx/Gtx    | 0.000168527 | 1.189757184  | Up         |
| 16 GstO2      | 0.000209972 | 1.510206221  | Up         |
| 17 DefF2      | 0.000292519 | -0.640178689 | Down       |
| 18 Cyp4g11    | 0.000370339 | 0.825928994  | Up         |
| 19 Trxr-1     | 0.000606566 | 1.441878171  | Up         |
| 20 Rsod       | 0.000842094 | 1.255522862  | Up         |
| 21 Cyp6bd1    | 0.000895332 | 1.107718079  | Up         |
| 22 Tpx5       | 0.000895332 | 1.490533886  | Up         |
| 23 Gtpx1      | 0.004267108 | -0.562430366 | Down       |
| 24 Trx1-like2 | 0.004267108 | -0.441305624 | Down       |
| 25 Obp21      | 0.006305542 | 3.045853631  | Up         |
| 26 CCS        | 0.007839115 | 2.109938747  | Up         |

| Gene                 | FDR         | logFC        | Regulation |
|----------------------|-------------|--------------|------------|
| 27 Trx1              | 0.007928216 | 0.629539606  | Up         |
| 28 AChE-2            | 0.013108948 | -0.479519602 | Down       |
| 29 Tpx3              | 0.014996185 | 0.803097403  | Up         |
| 30 Cat               | 0.017555048 | 0.759332849  | Up         |
| 31 GstS1             | 0.042206547 | 0.381846224  | Up         |
| 32 GstO1             | 0.048847638 | 0.957056383  | Up         |
| <b>Up=16 Down=16</b> |             |              |            |
| Week 4               |             |              |            |
| 1 Vg                 | 0.001242008 | -0.606664482 | Down       |
| 2 CSP3               | 0.00252203  | -0.503672436 | Down       |
| 3 Nmdar1             | 0.002523729 | -0.489465881 | Down       |
| 4 MsrA               | 0.006270594 | -0.542183971 | Down       |
| 5 AChE-2             | 0.007054297 | -0.467422182 | Down       |
| 6 GSTmic2            | 0.007054297 | 0.635050548  | Up         |
| 7 Trx2               | 0.007054297 | -0.430007244 | Down       |
| 8 Grx-like1          | 0.012104495 | -0.444598377 | Down       |
| 9 Def1               | 0.01305566  | -0.44637647  | Down       |
| 10 Trx1              | 0.015380605 | 0.546124297  | Up         |
| 11 Rsod              | 0.016919141 | 0.877252547  | Up         |
| 12 Gtpx1             | 0.020410695 | -0.422238441 | Down       |
| 13 Cyp9q1            | 0.028824892 | -0.374761958 | Down       |
| 14 Tpx5              | 0.028824892 | 0.875701234  | Down       |
| <b>Up=3 Down=11</b>  |             |              |            |
| Overall weeks        |             |              |            |
| 1 Trx1               | 2.31E-13    | 0.716399134  | Up         |
| 2 MsrA               | 5.77E-13    | -0.679235231 | Down       |
| 3 Rsod               | 5.82E-12    | 1.574315294  | Up         |

| Gene         | FDR         | logFC        | Regulation |
|--------------|-------------|--------------|------------|
| 4 Vg         | 5.82E-12    | -0.826047318 | Down       |
| 5 GSTmic2    | 2.35E-09    | 0.867077354  | Up         |
| 6 Tpx5       | 2.98E-09    | 1.177112211  | Up         |
| 7 Trx2       | 6.22E-09    | -0.490134369 | Down       |
| 8 Nmdar1     | 1.49E-08    | -0.617713476 | Down       |
| 9 CSP3       | 3.57E-08    | -0.634702226 | Down       |
| 10 Cyp6bd1   | 7.29E-08    | 0.970961205  | Up         |
| 11 Cyp4g11   | 3.27E-07    | 0.618538837  | Up         |
| 12 AChE-2    | 1.33E-06    | -0.40628725  | Down       |
| 13 Grx-like1 | 1.33E-06    | -0.584585069 | Down       |
| 14 Gtpx1     | 1.41E-06    | -0.401699776 | Down       |
| 15 MsrB      | 1.41E-06    | 0.798387461  | Up         |
| 16 Def1      | 1.56E-06    | -0.613786308 | Down       |
| 17 Trxr-1    | 9.85E-06    | 0.977293279  | Up         |
| 18 Grx1      | 1.33E-05    | 1.089440238  | Up         |
| 19 Trx/Gtx   | 1.53E-05    | 0.598159979  | Up         |
| 20 Cyp9q1    | 2.37E-05    | -0.529039749 | Down       |
| 21 CCS       | 6.18E-05    | 1.802497238  | Up         |
| 22 GstD1     | 8.11E-05    | 0.971662373  | Up         |
| 23 nAChRb2   | 9.14E-05    | 0.449655327  | Up         |
| 24 Mrjp      | 9.30E-05    | -0.530617812 | Down       |
| 25 Jhe       | 0.000116388 | -0.392980093 | Down       |
| 26 Obp21     | 0.00012842  | 1.797821637  | Up         |
| 27 GstO2     | 0.000806508 | 0.455560596  | Up         |
| 28 Grx2      | 0.002324083 | -0.305279916 | Down       |
| 29 Tpx3      | 0.008824973 | 0.633043926  | Up         |
| 30 Cat       | 0.009449226 | 0.284131552  | Up         |

| Gene                 | FDR         | logFC        | Regulation |
|----------------------|-------------|--------------|------------|
| 31 Cyp6as5           | 0.012545948 | -0.281873672 | Down       |
| 32 Tpx4              | 0.030356733 | -0.995920357 | Down       |
| <b>Up=17 Down=15</b> |             |              |            |

Genes are sorted descending from most (false discovery rate, FDR<0.001) to least (FDR<0.05) significant differential. logFC is the log fold-change and the regulation is for bees in cages. Table generated by the EdgeR package.
